# Supplementary material for: Beneficial Impact of Pork Dry-Cured Ham Consumption on Blood Pressure and Cardiometabolic Markers in Individuals with Cardiovascular Risk
Source: MDPI journal article supplement (doi:10.3390/nu14020298), 2022-01-11
Supplement: s1 [file nutrients-1494751-supplementary-done.pdf › nutrients-1494751-supplementary-done.pdf]

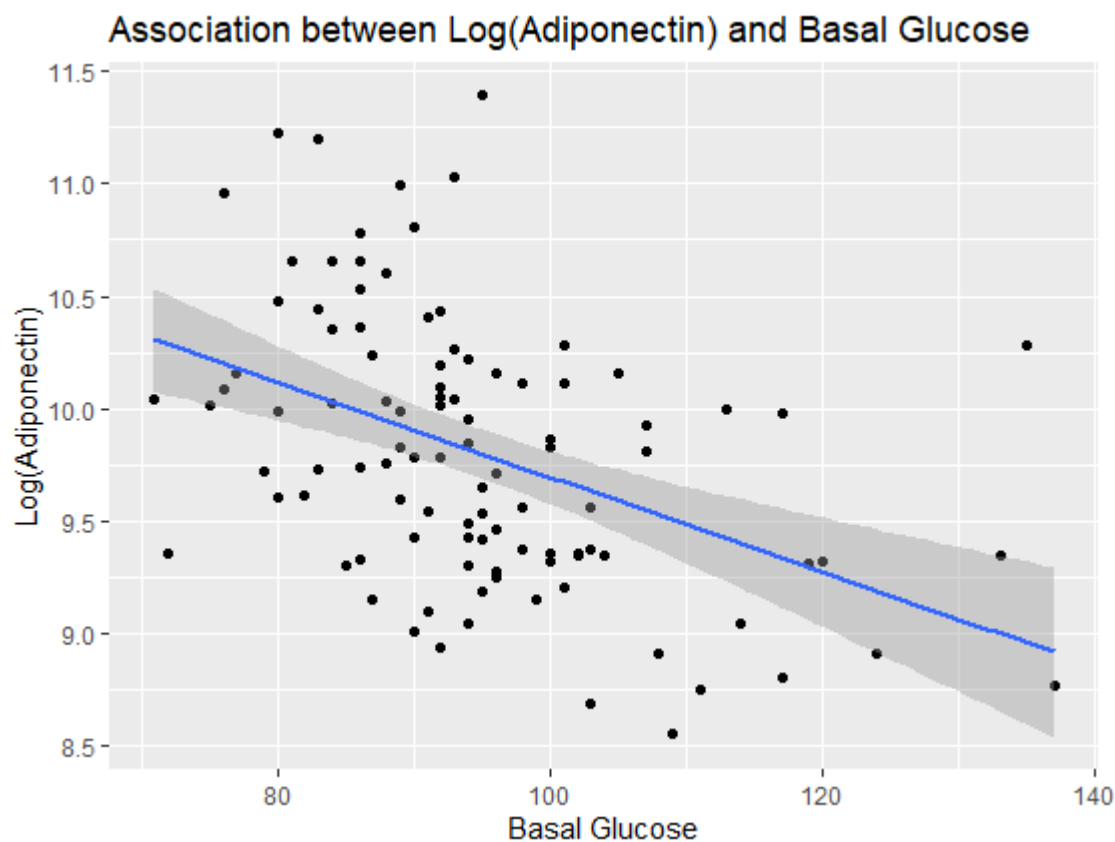

Figure S1. Linear regression and Pearson correlation between basal glucose and adiponectin at baseline status.

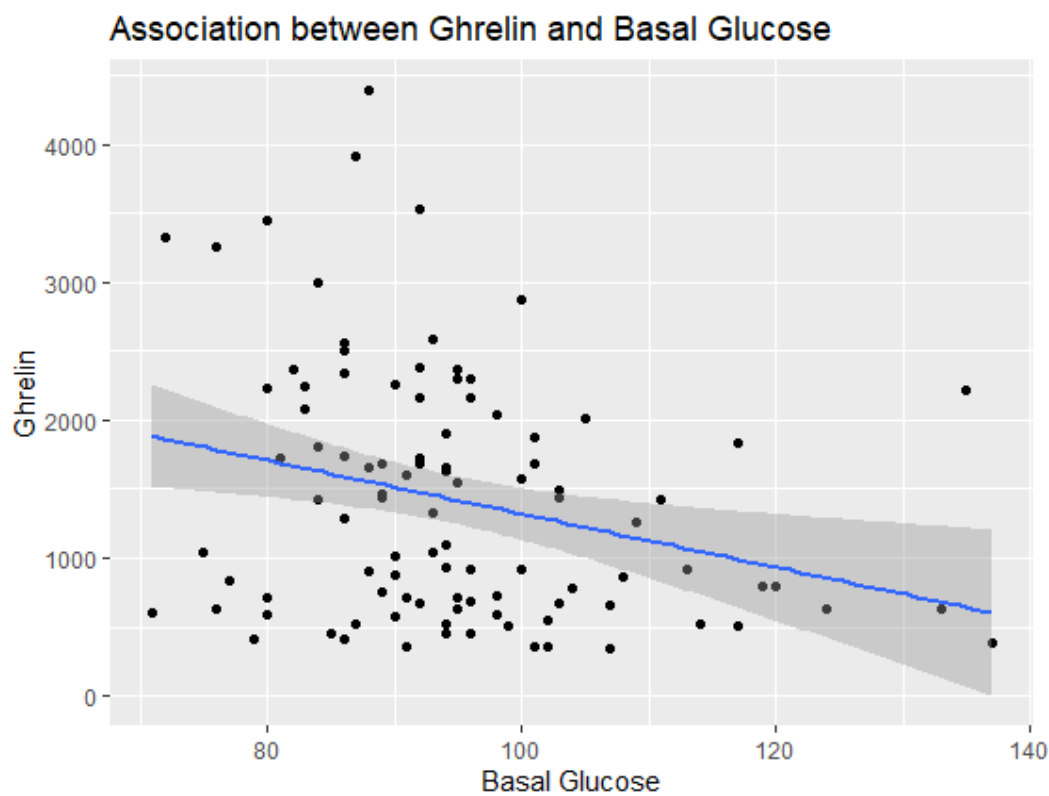

Figure S2. Linear regression and Pearson correlation between basal glucose and ghrelin at baseline status.
